# Supplementary material for: Measurement report: Ambient volatile organic compound (VOC) pollution in urban Beijing: characteristics, sources, and implications for pollution control
Source: Copernicus journal article supplement (doi:10.5194/acp-22-11931-2022), 2022-09-15
Supplement: Supplementary file 2 [file acp-22-11931-2022-supplement.zip]

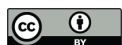

*Supplement of*

**Measurement report: Ambient volatile organic compound (VOC) pollution in urban Beijing: characteristics, sources, and implications for pollution control**

**Lulu Cui et al.**

*Correspondence to:* Shuxiao Wang ([shxwang@tsinghua.edu.cn](mailto:shxwang@tsinghua.edu.cn))

- [acp-22-11931-2022-supplement-title-page.pdf](#)
- Supplement - V2
  - [Supporting information.pdf](#)
  - [Table S1-VOCs mixing ratios \(ppbv\).xlsx](#)

The copyright of individual parts of the supplement might differ from the article licence.
