# Supplementary material for: Measurement report: Ambient volatile organic compound (VOC) pollution in urban Beijing: characteristics, sources, and implications for pollution control
Source: Copernicus journal article supplement (doi:10.5194/acp-22-11931-2022), 2022-09-15
Supplement: Supplementary file 3 [file acp-22-11931-2022-supplement.zip]

Archive with 4 entries (3 files):
- acp-22-11931-2022-supplement-title-page.pdf
- Supplement - V2/
- Supplement - V2/Supporting information.pdf
- Supplement - V2/Table S1-VOCs mixing ratios (ppbv).xlsx
