# Supplementary material for: Measurement report: Ambient volatile organic compound (VOC) pollution in urban Beijing: characteristics, sources, and implications for pollution control
Source: Copernicus journal article supplement (doi:10.5194/acp-22-11931-2022), 2022-09-15
Supplement: Supplementary file 3 [file acp-22-11931-2022-supplement.zip › Supplement - V2/Table S1-VOCs mixing ratios (ppbv).xlsx]

## Sheet: Sheet1
Results of monitored 95 VOCs species monitored: method detection limit (MDL) and concentrations during the sampling period (unit: ppbv). BDL: below the detection limit
	Alkanes																									Alkenes								Aromatics
	Isobutane	n-Butane	Iso-pentane	n-Pentane	2,2-Dimethylbutane	2-Methylpentane	3-Methylpentane	n-Hexane	2,4-Dimethylpentane	2-Methylhexane	3-Methylhexane	n-Heptane	2,2,4-Trimethylpentane	2,3,4-Trimethylpentane	2-Methylheptane	3-Methylheptane	n-Octane	n-Nonane	n-Decane	n-Undecane	n-Dodecane	Cyclopentane	Methyl cyclopentane	Cyclohexane	Methyl cyclohexane	1-Butene	Trans-2-butene	Cis-2-butene	1,3-Butadiene	1-Pentene	2-Pentene	Isoprene	1-Hexene	Benzene	Toluene	Ethylbenzene	m/p-Xylene	o-Xylene	Styrene	Iso-propylbenzene	n-Propylbenzene	m-Ethyl toluene	p-Ethyl toluene	o-Ethyl toluene	1,3,5-Trimethylbenzene	1,2,3-Trimethylbenzene	1,2,4-Trimethylbenzene	1,3-Diethylbenzene	1,4-Diethylbenzene
CAS	75-28-5	106-97-8	78-78-4	109-66-0	75-83-2	107-83-5	96-14-0	110-54-3	108-08-7	591-76-4	589-34-4	142-82-5	540-84-1	565-75-3	592-27-8	589-81-1	111-65-9	111-84-2	124-18-5	1120-21-4	112-40-3	287-92-3	96-37-7	110-82-7	108-87-2	106-98-9	624-64-6	590-18-1	106-99-0	109-67-1	109-68-2	78-79-5	592-41-6	71-43-2	108-88-3	100-41-4	108-38-3/106-42-3	95-47-6	100-42-5	98-82-8	103-65-1	620-14-4	622-96-8	611-14-3	108-67-8	526-73-8	95-63-6	141-93-5	105-05-5
MDL (ppbv)	0.038	0.041	0.024	0.026	0.0051987	0.008	0.0051987	0.0051987	0.00447097	0.00447097	0.00223549	0.00670646	0.003	0.00588295	0.007	0.00588295	0.00392196	0.00349304	0.00472302	0.00573226	0.0473421	0.026	0.00532323	0.00532323	0.00456276	0.027947	0.0239545	0.025	0.005	0.00958181	0.008	0.008	0.008	0.00286768	0.00486225	0.00843969	0.00843969	0.00421985	0.00430153	0.00559107	0.00559107	0.0073	0.00559107	0.00372738	0.00559107	0.00559107	0.00372738	0.00500677	0.00500677
RSD	0.03	0.05	0.04	0.05	0.04	0.07	0.04	0.06	0.06	0.06	0.06	0.06	0.06	0.05	0.06	0.06	0.06	0.04	0.05	0.06	0.06	0.06	0.05	0.06	0.06	0.06	0.06	0.06	0.06	0.05	0.06	0.06	0.06	0.06	0.05	0.04	0.05	0.04	0.06	0.05	0.005	0.06	0.06	0.05	0.06	0.06	0.06	0.05	0.03
Date	Isobutane	n-Butane	Iso-pentane	n-Pentane	2,2-Dimethylbutane	2-Methylpentane	3-Methylpentane	n-Hexane	2,4-Dimethylpentane	2-Methylhexane	3-Methylhexane	n-Heptane	2,2,4-Trimethylpentane	2,3,4-Trimethylpentane	2-Methylheptane	3-Methylheptane	n-Octane	n-Nonane	n-Decane	n-Undecane	n-Dodecane	Cyclopentane	Methyl cyclopentane	Cyclohexane	Methyl cyclohexane	1-Butene	Trans-2-butene	Cis-2-butene	1,3-Butadiene	1-Pentene	2-Pentene	Isoprene	1-Hexene	Benzene	Toluene	Ethylbenzene	m/p-Xylene	o-Xylene	Styrene	Iso-propylbenzene	n-Propylbenzene	m-Ethyl toluene	p-Ethyl toluene	o-Ethyl toluene	1,3,5-Trimethylbenzene	1,2,3-Trimethylbenzene	1,2,4-Trimethylbenzene	1,3-Diethylbenzene	1,4-Diethylbenzene
2018-12-01	0.55	1.39	0.79	0.52	0.03	0.27	0.24	0.64	0.14	0.08	0.09	0.11	0.2	0.07	0.05	0.12	0.09	0.06	0.07	0.04	0.03	0.11	0.36	0.07	0.04	0.79	0.56	0.12	BDL	0.52	0.04	BDL	0.55	0.94	1.57	0.24	0.32	0.27	0.25	0.01	0.03	0.1	0.1	0.04	0.04	0.1	0.04	0.01	0.01
2018-12-02	0.69	2.11	1.04	0.72	0.48	0.34	0.42	0.75	0.29	0.11	0.12	0.16	0.42	0.07	0.05	0.04	0.1	0.07	0.04	0.03	0.01	0.14	0.46	0.12	0.09	0.22	0.76	0.19	BDL	0.72	0.07	0.03	0.61	1.48	1.91	0.33	0.44	0.34	0.32	0.01	0.02	0.06	0.06	0.03	0.02	0.1	0.02	0	BDL
2018-12-03	0.22	0.61	0.31	0.19	0.03	0.09	0.1	0.31	0.35	0.02	0.03	0.03	0.02	0.02	BDL	BDL	0.05	0.02	BDL	BDL	BDL	0.08	0.18	0.01	BDL	0.42	0.23	0.11	BDL	0.19	BDL	BDL	0.25	0.52	0.61	0.16	0.14	0.09	0.09	BDL	BDL	0.02	0.02	0.01	0.02	0.03	BDL	BDL	BDL
2018-12-04	0.27	0.63	0.37	0.19	0.17	0.19	0.21	0.35	0.07	0.04	0.03	0.07	0.04	0.02	0.02	0.02	0.05	0.05	0.02	0.02	0.02	0.07	0.18	0.03	BDL	0.14	0.08	0.04	BDL	0.19	0.03	0.03	0.29	0.51	0.49	0.21	0.27	0.19	0.18	0.04	0.13	0.12	0.12	0.06	0.06	0.12	0.06	0.08	0.14
2018-12-05	0.36	0.99	0.57	0.37	0.17	0.17	0.18	0.28	0.07	0.05	0.05	0.08	0.05	0.02	0.03	0.02	0.08	0.03	0.03	0.01	BDL	0.1	0.25	0.03	0.04	0.26	0.15	0.18	0.05	0.37	0.04	0.04	0.23	0.79	0.78	0.17	0.26	0.2	0.18	BDL	0.01	0.05	0.05	0.02	0.03	0.07	0.02	0.01	0.01
2018-12-06	0.11	0.46	0.13	0.1	BDL	0.03	0.04	0.09	BDL	BDL	BDL	0.02	0.05	BDL	BDL	BDL	BDL	BDL	BDL	BDL	BDL	0.02	BDL	BDL	BDL	0.27	0.15	0.07	0	0.1	BDL	BDL	0.04	0.31	0.16	0.03	0.03	0.01	0.01	BDL	BDL	BDL	BDL	BDL	BDL	BDL	BDL	BDL	BDL
2018-12-07	0.14	0.22	0.1	0.07	BDL	0.05	0.02	0.1	BDL	BDL	BDL	0.06	0.12	BDL	BDL	BDL	BDL	BDL	BDL	BDL	0.02	0.03	BDL	BDL	BDL	0.16	0.09	0.05	BDL	0.08	BDL	BDL	0.05	0.28	0.13	0.03	0.03	0.01	0.01	BDL	BDL	BDL	BDL	BDL	BDL	BDL	BDL	BDL	BDL
2018-12-08	0.41	1.26	0.7	0.37	BDL	0.2	0.23	0.45	0.02	0.04	0.04	0.04	0.05	0.02	0.02	0.05	0.02	0.02	BDL	BDL	BDL	0.09	0.22	0.03	0.02	0.3	0.17	0.06	0.09	0.38	0.02	0.02	0.38	0.49	0.53	0.11	0.15	0.1	0.09	BDL	0.01	0.01	0.01	0.01	0.01	0.02	0.01	BDL	BDL
2018-12-09	0.34	1.15	0.72	0.39	0.09	0.36	0.53	1.12	0.22	0.14	0.14	0.15	0.07	0.04	0.06	0.09	0.09	0.06	0.04	0.01	0.02	0.12	0.41	0.07	0.08	0.4	0.5	0.25	0.06	0.39	0.02	0.04	0.9	0.81	3.21	0.2	0.28	0.21	0.2	BDL	0.02	0.05	0.05	0.02	0.02	0.07	0.02	BDL	BDL
2018-12-10	0.52	1.21	0.81	0.42	0.04	0.21	0.26	0.64	0.04	0.08	0.09	0.1	0.07	0.05	0.04	0.1	0.07	0.05	0.03	0.02	0.01	0.1	0.28	0.06	0.1	0.08	0.51	0.34	BDL	0.42	0.05	BDL	0.52	0.91	1.45	0.2	0.3	0.23	0.21	BDL	0.02	0.05	0.05	0.02	0.02	0.08	0.02	BDL	BDL
2018-12-11	0.33	1	0.51	1.51	0.2	0.46	0.61	0.92	0.11	0.15	0.14	0.15	0.07	0.05	0.04	0.09	0.06	0.03	0.01	BDL	BDL	0.13	0.36	0.06	0.06	0.79	0.44	0.29	BDL	0.27	BDL	0.05	0.74	0.6	3.09	0.13	0.2	0.14	0.13	BDL	0.01	0.03	0.03	0.02	0.02	0.05	0.01	BDL	BDL
2018-12-12	0.42	1.07	0.65	0.35	BDL	0.21	0.18	0.49	0.11	0.06	0.07	0.08	0.05	0.04	0.02	0.04	0.06	0.04	0.02	0.01	0.01	0.06	0.38	0.07	BDL	0.9	0.5	0.28	0.08	0.35	0.02	BDL	0.4	0.71	0.76	0.15	0.23	0.18	0.17	0.02	0.05	0.07	0.07	0.04	0.04	0.09	0.04	0.03	0.06
2018-12-13	0.35	0.79	0.64	0.29	0.06	0.25	0.34	1.42	0.1	0.06	0.07	0.07	0.05	0.02	0.03	0.03	0.05	0.02	0.02	0.01	0.01	0.12	0.32	0.04	0.11	0.18	0.09	0.12	BDL	0.3	0.02	0.04	1.14	0.51	1.25	0.16	0.27	0.19	0.17	0.01	0.01	0.04	0.04	0.02	0.02	0.07	0.02	0	BDL
2018-12-14	0.66	1.35	0.92	0.48	0.03	0.34	0.5	1.03	0.13	0.15	0.14	0.21	0.42	0.07	0.07	0.1	0.09	0.05	0.03	0.01	0.01	0.13	0.56	0.1	0.07	0.1	0.26	0.12	0.09	0.49	0.06	0.04	0.83	1.18	1.47	0.3	0.48	0.35	0.32	0.01	0.02	0.07	0.07	0.03	0.03	0.1	0.03	0.01	0.01
2018-12-15	1.15	3.23	1.91	1.21	0.13	0.41	0.64	0.94	0.22	0.18	0.19	0.28	0.31	0.08	0.12	0.08	0.17	0.1	0.05	0.04	0.05	0.18	0.77	0.16	0.15	0.15	1.48	0.17	0.08	1.2	0.08	0.12	0.76	1.78	2.49	0.49	0.69	0.56	0.52	0.02	0.04	0.13	0.13	0.06	0.05	0.24	0.05	0.03	0.03
2018-12-16	0.65	1.66	1.09	0.53	0.18	0.36	0.62	1.81	0.2	0.11	0.1	0.16	0.14	0.05	0.06	0.04	0.15	0.05	0.04	0.03	0.03	0.16	0.48	0.08	0.11	0.25	0.71	0.19	0.09	0.5	0.03	0.13	1.44	1.07	1.86	0.26	0.41	0.33	0.31	0.01	0.02	0.08	0.08	0.03	0.04	0.13	0.03	0.02	0.02
2018-12-17	0.56	1.35	0.77	2.81	0.03	0.23	0.34	0.51	0.1	0.06	0.07	0.09	0.08	0.02	0.02	0.05	0.06	0.03	0.02	0.01	BDL	0.14	0.42	0.06	0.03	0.42	0.56	0.04	0.07	0.41	0.03	0.05	0.44	0.86	1.72	0.19	0.31	0.21	0.19	0.01	0.01	0.03	0.03	0.01	0.02	0.07	0.01	0.01	0.01
2018-12-18	0.56	0.39	0.66	0.85	0.06	0.36	0.58	1.07	0.08	0.09	0.08	0.09	0.09	0.03	0.03	0.02	0.09	0.04	0.02	0.01	BDL	0.18	0.59	0.06	0.04	0.27	0.52	0.21	0.07	0.36	0.03	0.06	0.87	0.96	1.23	0.29	0.43	0.3	0.28	0.01	0.01	0.05	0.05	0.02	0.03	0.08	0.02	0.01	0.01
2018-12-19	0.33	1.21	0.81	0.4	0.11	0.23	0.44	0.83	0.22	0.1	0.42	0.14	0.07	0.04	0.05	0.06	0.09	0.04	0.04	0.02	0.02	0.14	0.49	0.07	0.04	0.58	0.71	0.23	0.06	0.4	0.02	0.07	0.68	0.84	1.08	0.24	0.36	0.28	0.26	0.02	0.04	0.07	0.07	0.04	0.04	0.11	0.04	0.03	0.05
2018-12-20	1.03	1.63	0.99	0.53	0.07	0.24	0.34	0.52	0.14	0.12	0.12	0.18	0.1	0.05	0.06	0.07	0.09	0.04	0.04	0.01	BDL	0.09	0.44	0.08	0.06	0.46	0.73	0.09	0.07	0.55	0.03	0.06	0.43	0.99	1.34	0.29	0.48	0.36	0.34	0.01	0.02	0.07	0.07	0.03	0.03	0.11	0.03	0.01	0.01
2018-12-21	0.82	1.8	1.11	0.59	0.09	0.27	0.35	0.77	0.1	0.09	0.1	0.14	0.08	0.04	0.04	0.05	0.09	0.03	0.02	BDL	BDL	0.12	0.37	0.06	0.09	0.42	0.23	0.11	0.1	0.61	0.04	0.06	0.26	0.97	1.62	0.25	0.38	0.3	0.28	0.01	0.01	0.05	0.05	0.02	0.02	0.08	0.02	BDL	BDL
2018-12-22	0.36	0.47	0.29	0.17	0.03	0.1	0.07	0.17	0.06	BDL	0.03	0.05	0.1	BDL	BDL	BDL	BDL	BDL	BDL	BDL	BDL	0.12	0.1	BDL	BDL	0.43	0.24	BDL	BDL	0.17	BDL	BDL	0.14	0.41	0.39	0.05	0.07	0.05	0.04	BDL	BDL	0.01	0.01	BDL	0.01	0.02	BDL	BDL	BDL
2018-12-23	0.18	0.73	0.43	0.26	0.05	0.11	0.19	0.49	0.27	0.03	0.04	0.05	0.03	0.02	0.02	0.04	0.03	0.02	0.02	0.01	0.02	0.07	0.15	0.02	0.02	0.68	0.37	BDL	BDL	0.25	0.02	BDL	0.4	0.44	0.63	0.09	0.14	0.11	0.1	BDL	0.01	0.04	0.04	0.02	0.03	0.14	0.02	0.02	0.02
2018-12-25	0.18	0.33	0.17	0.1	BDL	0.03	0.03	0.09	BDL	BDL	BDL	BDL	BDL	BDL	BDL	BDL	BDL	BDL	BDL	BDL	BDL	0.05	BDL	BDL	BDL	0.24	0.13	0.16	BDL	0.1	BDL	BDL	0.09	0.26	0.12	0.02	0.03	0.01	0.01	BDL	BDL	BDL	BDL	BDL	BDL	BDL	BDL	BDL	BDL
2018-12-26	0.35	0.45	0.21	0.16	BDL	0.08	0.07	0.19	0.04	BDL	BDL	BDL	0.02	BDL	BDL	BDL	BDL	BDL	BDL	BDL	BDL	0.09	0.08	0.01	BDL	0.35	0.19	0.18	BDL	0.16	BDL	BDL	0.13	0.39	0.34	0.09	0.1	0.07	0.06	BDL	0.01	0.02	0.02	0.01	0.01	0.03	0.01	0.01	0.01
2018-12-27	0.19	0.43	0.23	0.14	BDL	0.08	0	0.14	BDL	BDL	BDL	BDL	0	BDL	BDL	BDL	BDL	BDL	BDL	BDL	BDL	0.07	BDL	BDL	BDL	0.32	0.18	0.1	BDL	0.15	BDL	BDL	0.14	0.2	0.24	0.02	0.03	0.01	0.01	BDL	BDL	BDL	BDL	BDL	BDL	BDL	BDL	BDL	BDL
2018-12-28	0.32	0.53	0.25	0.15	BDL	0.1	0.06	0.66	BDL	BDL	BDL	0.07	0.15	0.01	BDL	0.02	BDL	BDL	BDL	BDL	BDL	0.1	0.09	BDL	BDL	0.39	0.22	0.12	BDL	0.15	BDL	BDL	0.56	0.39	0.34	0.04	0.05	0.03	0.03	BDL	BDL	BDL	BDL	BDL	BDL	BDL	BDL	BDL	BDL
2018-12-29	0.59	1.3	0.74	0.42	0.04	0.19	0.24	0.72	0.08	0.06	0.07	0.09	0.07	0.03	0.04	0.03	0.06	0.04	0.03	0.02	0.02	0.14	0.32	0.06	0.05	0.26	0.14	0.2	BDL	0.42	0.03	0.03	0.58	0.89	1.1	0.19	0.28	0.22	0.21	0.01	0.02	0.05	0.05	0.02	0.02	0.08	0.02	0.01	0.01
2018-12-30	0.31	0.86	0.52	0.26	0.03	0.12	0.13	0.44	0.07	0.04	0.05	0.06	0.04	0.04	BDL	0.05	0.04	BDL	BDL	BDL	BDL	0.1	0.23	0.03	BDL	0.3	0.36	0.46	BDL	0.26	0.02	BDL	0.36	0.54	0.67	0.13	0.22	0.15	0.14	BDL	0.01	0.03	0.03	0.01	0.02	0.04	0.01	BDL	BDL
2018-12-31	0.63	1.4	0.87	0.48	0.05	0.21	0.28	0.71	0.13	0.1	0.11	0.13	0.09	0.04	0.05	0.07	0.08	0.04	0.03	0.01	BDL	0.09	0.41	0.09	0.07	0.46	0.61	0.18	BDL	0.46	0.02	0.03	0.57	1.04	1.33	0.24	0.36	0.28	0.26	0.01	0.02	0.06	0.06	0.03	0.03	0.1	0.02	BDL	BDL
2019-01-01	0.87	2.17	1.37	2.37	0.47	0.38	0.61	1.64	0.42	0.15	0.15	0.23	0.21	0.05	0.08	0.06	0.15	0.1	0.07	0.04	0.04	0.28	0.63	0.11	0.12	0.16	0.88	0.13	0.08	0.28	0.07	0.14	0.45	1.5	2.58	0.38	0.54	0.43	0.4	0.02	0.04	0.11	0.11	0.05	0.05	0.22	0.05	0.03	0.03
2019-01-02	0.4	0.54	0.54	0.3	0.03	0.13	0.21	0.54	0.09	0.06	0.07	0.09	0.06	0.04	0.03	0.06	0.07	0.04	0.03	0.01	BDL	0.08	0.26	0.05	0.05	0.73	0.4	BDL	BDL	0.3	BDL	BDL	0.44	0.79	0.92	0.16	0.23	0.18	0.17	BDL	0.01	0.05	0.05	0.02	0.02	0.09	0.02	BDL	BDL
2019-01-05	0.46	1.21	0.65	0.37	0.03	0.19	0.23	0.37	0.09	0.06	0.06	0.1	0.05	0.03	0.02	0.07	0.07	0.02	0.01	0	BDL	0.07	0.26	0.08	0.03	0.87	0.48	BDL	0.1	0.37	0.03	0.04	0.3	0.7	0.88	0.31	0.5	0.36	0.17	0.01	0.01	0.03	0.03	0.01	0.02	0.06	0.01	BDL	BDL
2019-01-06	0.81	2.23	1.31	0.68	0.04	0.27	0.36	0.84	0.16	0.12	0.14	0.2	0.11	0.05	0.08	0.05	0.13	0.07	0.05	0.02	BDL	0.13	0.54	0.13	0.09	0.09	0.42	0.1	0.17	0.67	0.06	0.11	0.68	1.88	2.01	0.42	0.57	0.45	0.42	0.02	0.03	0.09	0.09	0.04	0.03	0.14	0.03	0.02	0.02
2019-01-07	0.54	1.18	0.59	0.34	BDL	0.15	0.11	0.26	0.04	0.03	0.03	0.06	0.04	0.02	BDL	0.03	0.05	BDL	0.01	BDL	BDL	0.07	0.22	0.04	0.04	0.85	0.47	0.7	BDL	0.35	0.02	BDL	0.22	0.86	1.01	0.11	0.18	0.14	0.13	0.01	0.01	0.03	0.03	0.01	0.02	0.05	0.01	0.01	0.01
2019-01-08	0.86	1.04	0.69	0.36	0.06	0.26	0.27	0.85	0.07	0.08	0.08	0.08	0.07	0.05	BDL	0.07	0.04	BDL	0	BDL	BDL	0.13	0.33	0.05	0.02	0.45	0.49	0.76	BDL	0.37	0.05	0.06	0.68	0.6	1.03	0.16	0.26	0.19	0.18	BDL	0.01	0.04	0.04	0.01	0.02	0.05	0.01	BDL	BDL
2019-01-11	0.83	1.83	0.92	0.52	0.03	0.21	0.32	0.44	0.09	0.07	0.08	0.12	0.07	0.03	0.03	0.08	0.07	0.03	0.02	BDL	BDL	0.09	0.52	0.1	0.04	0.51	0.75	0.37	0.06	0.53	0.06	0.04	0.38	1.21	1.15	0.22	0.35	0.23	0.22	0.01	0.01	0.04	0.04	0.02	0.02	0.06	0.01	BDL	BDL
2019-01-14	0.27	0.9	0.48	0.4	BDL	0.12	0.15	0.28	0.08	0.06	0.07	0.08	0.01	0.31	0.14	0.02	0.05	0.03	0.02	0.01	BDL	0.05	0.23	0.11	0.05	0.12	0.37	0.11	BDL	0.34	0.02	0.02	0.23	0.98	0.99	0.13	0.21	0.16	0.15	BDL	0.01	0.03	0.03	0.01	0.01	0.06	0.01	BDL	BDL
2019-01-17	0.67	1.95	1.06	0.58	0.1	0.26	0.41	0.44	0.1	0.09	0.1	0.12	0.09	0.05	0.05	0.04	0.12	0.04	0.02	BDL	BDL	0.12	0.53	0.11	0.07	0.62	0.85	0.07	0.07	0.59	0.07	0.09	0.38	1.02	1.36	0.38	0.77	0.69	0.65	0.01	0.02	0.07	0.07	0.03	0.03	0.11	0.02	BDL	BDL
2019-04-15	0.31	0.89	0.46	0.3	0.1	0.19	0.17	0.45	0.19	0.06	0.05	0.08	0.03	0.02	0.02	0.04	0.07	0.04	0.03	0.03	0.03	0.06	0.19	0.05	0.04	0.28	0.33	0.03	BDL	0.3	0.01	0.03	0.37	0.55	0.93	0.3	0.27	0.24	0.18	0.02	0.05	0.21	0.22	0.13	0.22	0.25	0.04	0.01	0.04
2019-04-16	0.38	0.9	0.66	0.42	0.07	0.15	0.17	0.98	0.18	0.06	0.06	0.11	0.04	0.02	0.02	0.05	0.08	0.06	0.05	0.04	0.06	0.13	0.24	0.11	0.47	0.39	0.21	0.02	BDL	0.39	0.02	BDL	0.82	0.51	1.11	0.41	0.54	0.43	0.32	0.03	0.05	0.2	0.2	0.11	0.17	0.18	0.04	0.02	0.04
2019-04-17	0.84	1.88	1.06	1.29	0.32	0.24	0.61	2.1	0.27	0.09	0.08	0.12	0.08	0.03	0.05	0.05	0.11	0.08	0.06	0.04	0.04	0.14	0.74	0.08	0.08	0.09	0.69	0.11	BDL	0.61	0.05	0.05	1.72	1.29	1.37	0.45	0.53	0.44	0.33	0.02	0.03	0.08	0.08	0.04	0.05	0.13	0.03	0.02	0.02
2019-04-19	0.52	1.08	0.62	0.34	0.44	0.24	0.38	2.27	0.15	0.05	0.05	0.1	0.15	0.03	0.03	0.04	0.07	0.04	0.02	0.02	0.03	0.16	0.41	0.05	0.05	0.26	0.45	0.24	BDL	0.33	0.02	0.03	1.85	0.46	0.9	0.22	0.27	0.22	0.16	0.01	0.02	0.04	0.04	0.02	0.02	0.08	0.02	0.01	0.01
2019-04-20	0.59	1.25	0.91	0.62	0.07	0.19	0.35	0.59	0.22	0.09	0.08	0.14	0.09	0.04	0.06	0.04	0.1	0.07	0.06	0.03	0.03	0.14	0.41	0.09	0.07	0.06	0.48	0.03	BDL	0.51	0.03	0.06	0.5	0.59	1.29	0.4	0.51	0.43	0.32	0.02	0.03	0.08	0.08	0.04	0.03	0.11	0.03	0.01	0.02
2019-04-21	0.5	0.78	0.49	0.28	0.1	0.13	0.13	0.55	0.13	0.05	0.04	0.07	0.03	0.02	0.01	0.03	0.06	0.04	0.06	0.03	0.04	0.12	0.17	0.03	0.09	0.31	0.31	0.28	BDL	0.28	BDL	0.02	0.45	0.47	0.63	0.19	0.22	0.19	0.14	0.01	0.02	0.04	0.04	0.02	0.03	0.05	0.02	0.01	0.01
2019-04-23	0.48	1.37	0.8	0.57	0.13	0.3	0.29	0.51	0.17	0.07	0.05	0.1	0.05	0.03	0.04	0.02	0.09	0.06	0.03	0.04	0.05	0.1	0.29	0.11	0.08	0.1	0.5	0.09	BDL	0.57	0.02	0.01	0.43	0.81	1	0.32	0.41	0.32	0.24	0.03	0.04	0.08	0.08	0.05	0.06	0.13	0.05	0.04	0.07
2019-04-24	0.16	0.38	0.2	0.12	0	0.06	0.04	0.11	0.09	0.01	0.04	0.04	0.01	BDL	BDL	0.01	0.03	BDL	0.03	0.01	0.02	0.04	0.08	0.04	0.02	0.33	0.19	0.11	BDL	0.12	BDL	BDL	0.09	0.31	0.29	0.08	0.12	0.09	0.07	0	0.01	0.03	0.03	0.02	0.03	0.05	0.01	0.01	0.01
2019-04-27	0.45	1.19	0.55	0.41	0.19	0.17	0.23	1.13	0.1	0.06	0.05	0.08	0.06	0.03	0.02	0.04	0.07	0.03	0.02	0.03	0.03	0.13	0.25	0.04	0.05	0.43	0.4	0.38	BDL	0.4	0.03	0.01	0.94	0.45	1.49	0.21	0.26	0.2	0.15	0	0.01	0.03	0.03	0.02	0.02	0.07	0.02	0.01	0.01
2019-05-01	0.3	0.91	0.79	0.38	0.07	0.27	0.49	1.38	0.18	0.08	0.08	0.07	0.06	0.04	0.03	0.03	0.07	0.07	0.08	0.02	0.04	0.22	0.11	0.11	0.04	0.07	0.36	0.08	0.06	0.1	0.02	0.05	0.19	0.34	1.14	0.79	1.02	0.52	0.39	0.03	0.02	0.06	0.06	0.03	0.03	0.09	0.03	0.01	0.01
2019-05-03	0.28	0.74	0.47	0.3	0.03	0.09	0.13	0.24	0.2	0.04	0.04	0.06	0.03	0.02	0.01	0.03	0.06	0.03	0.02	0.02	0.02	0.04	0.19	0.03	0.03	0.05	0.27	0.05	BDL	0.29	BDL	0.01	0.2	0.59	0.68	0.16	0.2	0.16	0.12	0.01	0.02	0.03	0.03	0.03	0.02	0.06	0.03	0.02	0.02
2019-05-04	0.32	0.92	0.53	0.92	0.1	0.11	0.19	0.47	0.25	0.05	0.05	0.06	0.05	0.02	0.02	0.05	0.06	0.05	0.03	0.02	0.01	0.1	0.21	0.04	0.03	0.11	0.34	0.11	BDL	0.29	0.02	0.03	0.39	0.48	0.72	1.27	1.16	2.12	1.58	0.01	0.02	0.03	0.03	0.02	0.01	0.07	0.01	0.01	0.01
2019-05-06	0.27	0.75	0.56	0.3	BDL	0.16	0.35	0.75	0.14	0.04	0.06	0.05	0.03	0.02	0.02	0.02	0.16	0.11	0.02	0.02	0.01	0.13	0.37	0.11	0.03	0.53	0.3	BDL	BDL	0.31	0.02	BDL	0.63	0.32	2.46	0.54	1.09	1.14	0.85	0.02	0.01	0.03	0.03	0.01	0.02	0.06	0.01	0.01	0.01
2019-05-07	0.13	0.47	0.33	0.12	0.04	0.11	0.15	0.48	0.22	0.03	0.05	0.32	0.03	0.02	BDL	0.05	0.05	0.03	0.03	BDL	0.03	0.13	0.21	0.04	0.02	0.29	0.21	0.07	BDL	0.25	BDL	BDL	0.39	0.24	1	0.14	0.24	0.21	0.16	0	0.01	0.02	0.02	0.01	0.01	0.05	0.01	BDL	BDL
2019-05-08	0.44	1.86	1.18	0.57	0.08	0.29	0.61	1.08	0.32	0.11	0.09	0.14	0.25	0.05	0.06	0.07	0.21	0.15	0.04	0.04	0.04	0.13	0.18	0.15	0.06	0.4	0.73	0.07	BDL	0.67	0.05	0.04	0.88	0.83	1.72	0.66	1.08	1.18	0.88	0.04	0.03	0.09	0.1	0.05	0.05	0.18	0.04	0.01	0.02
2019-05-12	0.06	0.09	0.06	0.03	BDL	0.03	0.03	0.11	0.05	BDL	BDL	BDL	BDL	BDL	BDL	BDL	0.02	0.32	0.01	0.02	0.04	0.02	0.03	0.01	BDL	0.08	0.06	0	BDL	0.03	BDL	BDL	0.09	0.08	0.13	0.06	0.11	0.12	0.09	0.02	0.01	0.03	0.03	0.03	0.03	0.06	0.03	0.03	0.03
2019-05-14	0.8	2.06	1.24	0.67	0.01	0.18	0.23	0.62	0.02	0.08	0.07	0.14	0.05	0.03	0.04	0.05	0.08	0.05	0.03	0.02	BDL	0.15	0.37	0.08	0.06	1.4	0.79	1	BDL	0.67	0.06	0.02	0.09	0.76	1.22	0.37	0.5	0.45	0.33	0.01	0.02	0.05	0.05	0.03	0.02	0.06	0.02	0.01	0.01
2019-05-16	0.21	0.69	0.55	0.28	0.15	0.16	0.12	0.29	0.08	0.04	0.04	0.06	0.03	0.02	0.01	0.03	0.05	0.01	0.06	0.01	BDL	0.08	0.14	0.03	BDL	0.33	0.52	0.17	BDL	0.28	0.03	BDL	0.26	0.27	0.54	0.08	0.13	0.1	0.07	BDL	BDL	0.01	0.01	0	0.01	0.02	0	BDL	BDL
2019-05-18	0.34	0.75	0.52	0.74	0.07	0.09	0.18	0.34	0.61	0.06	0.05	0.09	0.03	0.01	0.02	0.04	0.06	0.07	0.04	0.03	0.04	0.36	0.03	0.05	0.05	0.16	0.28	0.16	BDL	0.28	0.02	0.07	0.28	0.39	0.84	0.2	0.28	0.23	0.17	0.01	0.02	0.04	0.04	0.02	0.02	0.07	0.01	0.01	0.01
2019-05-27	0.26	1.31	0.98	0.46	0.08	0.46	0.21	0.94	0.41	0.05	0.06	0.08	0.1	0.03	0.03	0.04	0.03	0.03	0.03	0.02	BDL	0.52	0.31	0.06	0.04	0.75	0.42	0.23	BDL	0.49	BDL	BDL	0.76	0.66	0.97	0.24	0.24	0.21	0.17	0.01	0.02	0.03	0.03	0.02	0.02	0.04	0.01	BDL	BDL
2019-06-17	0.57	1.51	1.14	0.54	0.05	1.36	0.14	0.4	0.02	0.05	0.05	0.07	0.05	0.03	0.02	0.04	0.02	0.04	0.04	0.01	BDL	0.19	0.25	0.03	0.03	1.01	0.57	0.13	BDL	0.58	0.02	0.02	0.08	0.6	0.76	0.25	0.29	0.25	0.19	0.01	0.02	0.04	0.04	0.02	0.02	0.06	0.01	0.01	0.01
2019-06-19	0.65	1.4	0.85	0.42	0.19	0.2	0.21	0.69	0.65	0.08	0.07	0.11	0.06	0.02	0.04	0.04	0.13	0.06	0.07	0.04	0.04	0.16	0.33	0.05	0.06	0.15	0.49	0.15	BDL	0.41	0.05	0.04	0.56	0.71	0.99	0.42	0.49	0.43	0.31	0.01	0.03	0.07	0.07	0.04	0.04	0.12	0.02	0.02	0.02
2019-06-20	0.45	1.21	0.77	0.37	0.04	0.19	0.14	0.37	0.13	0.06	0.05	0.07	0.2	0.03	0.03	0.03	0.08	0.03	0.05	0.02	0.01	0.08	0.26	0.05	0.04	0.45	0.44	0.04	BDL	0.37	0.01	0.01	0.31	0.81	0.65	0.27	0.33	0.29	0.21	0.01	0.02	0.05	0.05	0.02	0.02	0.09	0.02	0.02	0.02
2019-06-24	0.5	1.62	1.05	0.57	0.07	0.28	0.62	0.9	0.18	0.06	0.05	0.07	0.07	0.02	0.03	0.03	0.07	0.04	0.05	0.01	0.01	0.21	0.12	0.07	0.04	0.69	0.55	0.6	BDL	0.55	0.03	0.02	1.03	0.64	0.82	0.22	0.23	0.2	0.15	0	0.01	0.03	0.03	0.01	0.01	0.06	0.01	BDL	BDL
2019-06-25	0.83	1.91	1.57	0.81	0.04	0.52	0.3	1.17	0.1	0.06	0.04	0.11	0.06	0.03	0.04	0.03	0.05	0.05	0.04	0.01	BDL	0.84	0.45	0.08	0.07	0.63	0.67	0.17	BDL	0.75	0.04	0.03	0.51	0.55	0.99	0.27	0.35	0.3	0.22	0.01	0.02	0.04	0.04	0.02	0.02	0.05	0.02	BDL	BDL
2019-06-30	0.41	0.75	0.6	0.18	BDL	0.1	0.15	0.9	0.07	0.14	0.03	0.02	0.02	0.01	BDL	0.01	0.03	0.02	0.01	BDL	BDL	0.14	0.08	0.02	0.01	0.51	0.29	0.41	BDL	0.18	BDL	BDL	0.7	0.11	0.28	0.14	0.21	0.18	0.14	0.01	0.02	0.04	0.04	0.02	0.02	0.03	0.01	BDL	BDL
2019-07-01	0.36	1.14	0.67	0.33	BDL	0.12	0.17	0.75	0.05	0.04	0.05	0.06	0.07	0.02	BDL	0.03	0.02	0.01	0.02	0.01	BDL	0.16	0.25	0.03	0.02	0.71	0.4	0.65	BDL	0.31	BDL	BDL	0.62	0.18	0.46	0.13	0.17	0.13	0.1	BDL	0.01	0.02	0.02	0.01	0.02	0.03	0	BDL	BDL
2019-07-02	0.35	0.96	1.07	0.4	0.05	0.06	0.24	0.37	0.22	0.05	0.05	0.07	0.05	0.02	0.02	0.02	0.04	0.03	0.05	0.03	0.02	0.16	0.49	0.04	0.03	0.19	0.22	0.83	BDL	0.38	BDL	0.05	0.25	0.53	0.91	0.28	0.28	0.23	0.17	0	0.02	0.07	0.07	0.04	0.04	0.09	0.02	0.01	0.01
2019-07-05	0.56	1.53	1.08	0.45	0.08	0.44	0.51	1.19	0.25	0.15	0.05	0.19	0.06	0.02	0.03	0.03	0.05	0.04	0.05	0.04	BDL	0.57	1.11	0.11	0.05	0.94	0.53	0.59	BDL	0.47	0.02	BDL	0.07	0.45	1.18	0.32	0.55	0.67	0.51	0.02	0.07	0.23	0.23	0.09	0.08	0.45	0.09	0.02	0.02
2019-07-07	0.41	1.08	0.88	0.26	0.02	0.23	0.22	0.78	0.06	0.06	0.07	0.04	0.06	0.02	BDL	0.04	0.04	0.03	0.03	0.01	BDL	0.35	0.34	0.04	0.03	0.81	0.46	0.39	BDL	0.31	BDL	BDL	0.36	0.3	0.96	0.17	0.24	0.22	0.15	0	0.01	0.03	0.03	0.02	0.02	0.05	0.01	BDL	BDL
2019-07-09	0.58	1.2	1.02	0.39	0.01	0.12	0.21	1.24	0.07	0.07	0.04	0.03	0.05	0.02	0.02	0.03	0.04	0.03	0.04	0.01	BDL	0.3	0.35	0.05	0.03	0.41	0.48	0.37	BDL	0.38	BDL	BDL	0.46	0.33	0.7	0.22	0.25	0.21	0.16	0.01	0.02	0.04	0.04	0.02	0.02	0.06	0.02	BDL	BDL
2019-07-10	0.42	0.98	0.85	0.41	0.04	0.18	0.22	0.9	0.12	0.06	0.06	0.03	0.05	0.03	0.02	0.04	0.03	0.04	0.04	0.01	BDL	0.22	0.35	0.04	0.03	0.68	0.39	0.63	BDL	0.4	BDL	BDL	0.64	0.27	0.32	0.17	0.23	0.2	0.15	0	0.02	0.03	0.04	0.02	0.02	0.05	0.01	BDL	BDL
2019-07-13	0.34	1.02	1	0.48	0.05	0.32	0.29	2.21	0.03	0.08	0.07	0.13	0.06	0.02	0.04	0.03	0.04	0.05	0.05	0.04	BDL	0.14	0.51	0.07	0.04	0.12	0.39	0.14	BDL	0.47	0.02	0.02	0.3	0.58	0.79	0.24	0.27	0.25	0.18	0.01	0.02	0.04	0.04	0.02	0.03	0.06	0.02	BDL	BDL
2019-09-22	1.36	4.17	2.68	1.32	BDL	0.83	0.57	1.85	0.69	0.14	0.13	0.16	0.14	0.09	BDL	0.43	0.15	0.05	BDL	BDL	BDL	0.43	0.92	0.21	0.05	2.72	1.09	0.12	BDL	1.32	BDL	BDL	0.99	1.33	1.91	0.85	1.45	1.09	1.08	BDL	0.03	0.03	0.02	0.07	0.05	0.1	BDL	BDL	BDL
2019-09-23	1.15	2.95	1.97	1.03	1.06	BDL	0.17	5.57	0.19	0.05	0.12	0.13	0.1	0.03	BDL	0	0.16	0.04	BDL	BDL	BDL	0.45	1.98	0.18	0.08	2.21	0.27	0.27	BDL	1	BDL	BDL	2.89	1.16	2.45	0.39	0.51	0.4	0.4	0.01	0.01	0.02	0.02	0.01	0.04	0.02	BDL	BDL	BDL
2019-09-24	0.47	1.38	1.05	0.52	BDL	1.87	0.14	0.37	0.08	BDL	BDL	BDL	BDL	BDL	BDL	0	0.05	BDL	BDL	BDL	BDL	0.17	0.16	BDL	BDL	0.87	0.86	BDL	BDL	0.48	BDL	BDL	0.28	0.37	0.78	0.18	0.27	0.19	0.19	BDL	BDL	0.01	0.01	BDL	BDL	BDL	BDL	BDL	BDL
2019-09-25	0.95	2.15	1.51	0.74	0.06	0.88	0.27	0.99	0.07	0.51	0.11	0.34	0.08	0.09	BDL	0.19	0.12	0.16	BDL	BDL	BDL	0.11	0.43	0.16	BDL	1.43	1.39	BDL	BDL	0.72	BDL	BDL	0.42	0.7	1.43	0.37	0.47	0.4	0.4	BDL	BDL	BDL	BDL	0.04	BDL	BDL	BDL	BDL	BDL
2019-09-26	0.68	3.23	2.05	1.1	BDL	0.25	0.46	1.53	0.11	0.16	0.14	0.16	1.69	0.15	0.11	0.26	0.13	BDL	BDL	BDL	BDL	0.23	0.69	0.17	0.04	2.08	2.05	BDL	BDL	1.07	BDL	BDL	0.8	0.92	1.64	0.3	0.38	0.31	0.31	0.02	BDL	0.01	0.01	0.02	0.03	0.02	BDL	BDL	BDL
2019-09-27	1.5	3.32	2.05	1.49	BDL	0.91	0.3	0.84	0.12	0.07	0.06	0.14	0.07	BDL	BDL	BDL	0.13	0.04	BDL	BDL	BDL	0.3	0.5	0.14	0.06	2.07	2.04	BDL	BDL	1.42	BDL	BDL	0.44	1.97	1.56	0.48	0.69	0.55	0.54	0	0.02	0.03	0.02	0.02	0.04	0.02	BDL	BDL	BDL
2019-09-28	1.18	3.9	2.25	1.04	0.09	2.57	0.52	2.38	0.08	0.78	0.14	0.33	0.12	0.07	0.04	0.1	0.16	0.11	BDL	BDL	BDL	0.41	0.95	0.19	0.1	2.35	2.34	BDL	BDL	1.04	BDL	BDL	1.09	1.14	1.98	0.41	0.57	0.49	0.49	0.01	0.01	0.01	0.01	0.02	0.03	0.02	BDL	BDL	BDL
2019-09-30	1.68	5.67	3.11	1.55	BDL	0.72	0.52	1.97	0.49	0.17	0.21	0.17	1.16	0.13	0.07	0.14	0.23	0.13	0.14	BDL	BDL	0.35	0.91	0.2	0.11	4.5	0.21	0.21	BDL	1.46	0.07	BDL	0.88	1.84	2.25	0.48	0.67	0.56	0.57	BDL	0.05	0.08	0.05	0.08	0.09	0.14	0.02	BDL	BDL
2019-10-01	1.04	3.72	2.5	1.29	BDL	0.51	0.35	1.29	0.62	0.09	0.11	0.17	0.08	0.09	0	0.13	0.16	0.05	BDL	BDL	BDL	0.28	0.62	0.15	0.09	2.31	1.18	0.1	BDL	1.22	BDL	BDL	0.74	1.32	1.61	0.34	0.43	0.37	0.37	BDL	0.01	0.03	0.02	0.03	0.04	0.05	BDL	BDL	BDL
2019-10-02	1.08	3.36	2.24	1.3	BDL	0.26	0.31	1.18	0.22	0.68	0.06	0.22	0.07	BDL	0.06	0.08	0.15	0.05	BDL	BDL	BDL	0.22	0.49	0.17	0.06	0.98	0.96	0.09	BDL	1.28	BDL	BDL	0.53	1.22	0.97	0.2	0.23	0.18	0.18	BDL	BDL	0.01	0.01	0.03	0.02	0.02	BDL	BDL	BDL
2019-10-03	0.78	2.41	1.74	0.83	BDL	0.81	0.18	0.59	0.09	0.12	0.09	0.17	0.05	0.05	BDL	0.08	0.09	0.06	BDL	BDL	BDL	0.15	0.29	0.1	0.05	1.93	0.71	0.12	BDL	0.85	BDL	BDL	0.08	0.85	1.05	0.22	0.28	0.24	0.24	0.01	BDL	0.01	0.01	BDL	0	0	BDL	BDL	BDL
2019-10-07	1.69	5.08	3.24	1.51	BDL	0.33	1.37	2.53	0.21	0.14	0.16	0.22	0.13	0.09	BDL	0.14	0.16	0.11	0.04	BDL	BDL	0.28	2.79	0.27	0.11	3.23	1.69	0.22	BDL	1.45	0.06	BDL	0.44	1.29	2.45	0.39	0.52	0.41	0.42	0.01	BDL	BDL	BDL	BDL	0.05	0.03	BDL	BDL	BDL
2019-10-08	0.65	1.81	1.23	0.61	0.1	3.22	0.2	1.41	0.29	0.04	0.07	0.08	0.07	0.05	BDL	0	0.14	BDL	0.04	BDL	BDL	0.54	1.46	0.1	BDL	1.32	1.19	BDL	BDL	0.59	BDL	BDL	0.34	0.53	1.16	0.21	0.31	0.23	0.22	BDL	0.01	0.02	0.01	0.02	0.03	0.04	BDL	BDL	BDL
2019-10-09	0.45	1.62	1.08	0.65	0.24	1.92	0.29	1.07	0.16	0.05	0	0.06	0.04	0.05	BDL	0.07	0.1	0.06	BDL	BDL	BDL	0.17	0.49	0.04	BDL	1.15	1.14	BDL	BDL	0.62	BDL	BDL	0.6	0.62	1.28	0.22	0.35	0.28	0.28	0.01	BDL	0.01	0.01	BDL	0.02	0.02	BDL	BDL	BDL
2019-10-10	1.09	2.48	1.89	0.89	BDL	1.46	0.3	0.52	0.09	0.21	0.2	0.17	0.1	0.08	BDL	0.07	0.12	0.05	BDL	BDL	BDL	0.18	0.48	0.14	0.07	1.77	1.73	BDL	BDL	0.88	0.06	BDL	0.35	0.93	1.85	0.44	0.69	0.53	0.58	BDL	0.01	0.02	0.02	0.02	0.04	0.03	BDL	BDL	BDL
2019-10-14	0.68	1.37	0.95	0.75	BDL	0.56	2.47	3.14	0.32	0.16	0.25	0.21	0.09	0.04	BDL	0.06	0.1	0.04	BDL	BDL	BDL	0.28	1.3	0.18	0.11	1.05	0.4	0.11	BDL	0.75	BDL	BDL	1.53	1.05	2.02	0.4	0.7	0.47	0.47	BDL	BDL	0.02	0.02	BDL	0.05	BDL	BDL	BDL	BDL
2019-10-15	0.72	2.24	1.66	0.78	BDL	0.52	1.22	2.29	0.13	0.29	0.09	0.14	0.09	0.05	BDL	0.07	0.15	0.08	BDL	BDL	BDL	0.3	2.39	0.11	0.07	1.72	1.7	BDL	BDL	0.76	0.06	BDL	2.74	0.75	1.95	0.36	0.58	0.42	0.42	BDL	BDL	0.02	0.02	BDL	0.05	BDL	BDL	BDL	BDL
2019-10-16	1.94	3.28	2.12	1.26	BDL	0.24	0.41	1.45	BDL	0.14	0.13	0.19	0.09	0.05	BDL	0.07	0.15	0.05	BDL	BDL	BDL	0.27	0.68	0.1	0.1	2.21	2.18	BDL	BDL	1.29	BDL	BDL	0.67	1.48	3.21	0.51	0.76	0.57	0.57	BDL	BDL	0.01	0.01	0.02	0.03	0.02	BDL	BDL	BDL
2019-10-17	2.34	5.12	3.64	2.05	BDL	0.48	0.83	2.78	0.08	0.17	0.17	0.27	0.16	0.1	0.09	0.14	0.2	0.13	BDL	BDL	BDL	0.26	1.48	0.54	0.14	0.28	0.21	0.21	BDL	2.05	0.18	0.17	1.31	2.33	3.62	0.7	1.28	0.85	0.85	0.05	0.03	0.05	0.04	0.04	0.04	0.05	BDL	BDL	BDL
2019-10-18	1.38	4.11	2.95	1.72	BDL	1.19	0.8	2.32	0.06	0.2	0.24	0.28	0.15	0.09	0.08	0.11	0.19	0.1	BDL	BDL	BDL	0.34	1.15	0.36	0.14	3.1	3.03	BDL	BDL	1.7	0.14	0.07	1.04	1.75	2.8	0.58	0.83	0.68	0.68	0.02	0.02	0.02	0.02	0.02	0.06	0.03	BDL	BDL	BDL
2019-10-21	1.52	3.2	2.32	1.04	BDL	1.12	0.61	1.3	BDL	0.21	0.19	0.34	0.27	0.05	0.08	0.06	0.25	0.13	0.07	BDL	BDL	0.33	0.95	0.17	0.11	0.67	0.58	0.11	BDL	1.08	0.07	0.15	0.64	0.95	2.27	0.59	0.94	0.75	0.79	0.03	0.04	0.06	0.03	0.06	0.09	0.13	BDL	BDL	BDL
2019-10-22	2.09	5.69	3.64	1.9	BDL	1.67	0.99	3.05	0.14	0.34	0.42	0.55	0.3	0.12	0.18	0.12	0.45	0.31	0.14	BDL	BDL	0.46	1.64	0.42	0.25	0.34	0.21	0.21	BDL	2.13	0.13	0.26	1.65	3.43	4.35	1.03	1.42	1.22	1.22	0.06	0.09	0.13	0.06	0.14	0.12	0.33	0.03	BDL	BDL
2019-10-23	2.18	6.26	4.4	2.25	0.09	3	0.5	0.89	0.1	0.45	0.41	0.44	0.34	0.17	0.16	0.14	0.33	0.23	0.09	BDL	BDL	1.13	0.53	0.33	0.29	1.86	1.73	0.17	BDL	2.18	0.18	0.22	0.72	1.95	4.8	0.95	1.23	1.01	1	0.05	0.07	0.06	0.06	0.11	0.14	0.15	BDL	BDL	BDL
2019-10-24	1.33	3.45	2.12	1.41	0.07	2.5	0.37	1.19	0.05	0.22	0.12	0.17	0.09	0.03	0.06	0.05	0.12	0.1	0.04	BDL	BDL	0.26	0.63	0.2	0.14	2.17	2.14	BDL	BDL	1.36	0.1	0.09	0.58	1.94	2.04	0.78	1.1	0.84	0.84	0.02	0.04	0.04	0.02	0.05	0.04	0.05	BDL	BDL	BDL
2019-10-25	1.3	2.97	1.59	0.61	0.1	4.04	0.26	2.74	0.07	0.27	0.1	0.13	0.05	0.04	BDL	BDL	0.08	0.05	BDL	BDL	BDL	0.37	0.48	0.19	0.18	2.04	0.28	0.1	BDL	0.53	0.06	0.06	1.43	1.01	1.7	0.48	0.79	0.6	0.61	0	0.02	0.02	0.02	0.02	0.04	0.03	BDL	BDL	BDL
2019-10-26	1.03	2.66	1.87	0.96	BDL	0.72	0.89	3.18	0.05	0.23	0.24	0.21	0.15	0.07	0.06	0.09	0.19	0.11	BDL	BDL	BDL	0.26	1.46	0.26	0.09	0.53	0.56	0.12	BDL	0.99	0.1	0.1	1.8	1.66	2.44	0.6	0.85	0.63	0.64	0.04	0.07	0.09	0.07	0.08	0.08	0.09	BDL	BDL	BDL
2019-10-27	0.9	2.21	1.56	0.87	BDL	0.11	0.3	0.78	0.1	0.15	0.16	0.3	0.39	0.08	0.04	0.11	0.21	0.11	0.04	BDL	BDL	0.2	0.55	0.19	0.09	1.55	1.44	BDL	BDL	0.86	BDL	BDL	0.38	1.24	1.93	0.43	0.61	0.49	0.49	0.02	0.03	0.04	0.02	0.06	0.05	0.03	BDL	BDL	BDL
2019-10-28	0.24	0.4	0.26	0.13	BDL	0.61	0.17	1.24	BDL	1.84	0.05	BDL	0.03	BDL	BDL	BDL	0.06	BDL	BDL	BDL	BDL	0.1	0.34	BDL	BDL	0.39	0.38	BDL	BDL	0.14	BDL	BDL	0.63	0.28	0.51	0.14	0.22	0.16	0.16	BDL	BDL	BDL	BDL	0	BDL	BDL	BDL	BDL	BDL
2019-10-29	2.32	4.05	2.9	1.55	0.08	1.97	1.3	3.72	0.22	0.4	0.3	0.59	0.27	0.14	0.21	0.27	0.78	0.45	0.19	BDL	BDL	0.79	1.56	0.44	0.28	1.24	1.12	0.14	0.19	1.56	0.11	0.06	1.91	1.8	4.48	1.48	2.21	1.57	1.58	0.17	0.54	0.67	0.66	0.4	0.78	1.3	0.49	0.31	0.29
2019-10-30	2.96	5.02	3.43	1.65	BDL	2.32	0.71	4.07	0.1	0.21	0.32	0.4	0.18	0.08	0.07	0.09	0.19	0.14	0.05	BDL	BDL	0.68	1.2	0.55	0.17	2.2	0.25	0.25	BDL	1.66	0.17	0.13	1.89	1.58	3.62	0.73	1.11	0.88	0.86	0.04	0.02	0.04	0.04	0.04	0.07	0.06	BDL	BDL	BDL
2019-10-31	1.99	4.52	1.99	0.91	BDL	0.31	0.37	0.97	BDL	0.41	0.15	1.27	2.41	0.14	0.11	0.19	0.14	0.07	0.06	BDL	BDL	0.19	0.64	0.12	0.13	1.65	1.54	0.11	BDL	0.96	0.07	0.17	0.41	0.8	2.29	0.52	0.99	0.71	0.7	0.03	0.01	0.01	0.01	0.02	0.03	0.06	BDL	BDL	BDL
2019-11-01	1.19	4.83	2.74	1.58	0.07	1.04	0.54	1.74	0.09	0.19	0.24	1.02	0.44	0.09	0.08	0.11	0.25	0.12	0.14	BDL	BDL	0.34	0.92	1.49	0.2	1.64	1.61	0.12	BDL	1.61	0.14	0.08	0.83	1.44	3.13	0.56	0.92	0.71	0.71	0.02	0.04	0.05	0.05	0.07	0.08	0.23	0.05	BDL	BDL
2019-11-02	2.21	5.08	3.75	2.19	BDL	1.12	0.51	3.27	0.06	0.3	0.32	1.36	0.17	0.09	0.1	0.13	0.28	0.07	0.27	BDL	BDL	0.38	0.9	0.41	0.4	0.24	0.24	0.24	BDL	2.16	0.19	BDL	1.54	1.86	1.55	0.7	1.07	0.86	0.85	0.02	0.05	0.06	0.06	0.07	0.14	0.08	BDL	BDL	BDL
2019-11-04	1.55	3.03	2.66	1.5	0.11	3	0.81	1.73	0.05	0.17	0.21	0.15	0.38	1.43	0.55	1.37	0.21	0.04	0.06	BDL	BDL	0.33	0.88	0.31	0.12	0.51	0.37	0.09	BDL	1.52	0.12	0.09	0.72	1.43	2.19	0.4	0.58	0.5	0.52	0.02	BDL	0.01	0.01	0.04	0.04	0.08	BDL	BDL	BDL
2019-11-05	0.71	1.83	1.31	0.83	BDL	0.97	0.98	1.28	0.11	0.11	0	0.21	0.05	BDL	BDL	BDL	0.14	BDL	BDL	BDL	BDL	0.34	2.46	0.11	0.06	1.28	1.26	BDL	BDL	0.83	BDL	BDL	2.25	0.73	0.82	0.2	0.36	0.28	0.26	BDL	BDL	BDL	BDL	0	0	0	BDL	BDL	BDL
2019-11-06	1.84	5.14	3.17	1.7	0.07	1.87	0.51	1.34	0.11	0.23	0.23	0.3	0.49	0.1	0.06	0.14	0.28	0.1	0.09	BDL	BDL	0.39	0.96	0.29	0.19	1.59	1.5	0.1	BDL	1.75	0.17	0.11	0.65	1.51	3.39	0.65	1.07	0.79	0.83	0.02	0.03	0.02	0.02	0.06	0.06	0.13	BDL	BDL	BDL
2019-11-07	0.71	2.08	1.19	0.69	0.13	0.89	0.14	1.19	0.08	0.25	0.09	0.11	0.37	0.04	BDL	0.08	0.07	BDL	BDL	BDL	BDL	0.31	0.5	0.09	0.04	1.57	1.56	BDL	BDL	0.7	0.06	BDL	0.61	0.72	1.66	0.21	0.36	0.26	0.27	BDL	BDL	0.02	0.01	0.02	0.02	0.02	BDL	BDL	BDL
2019-11-09	0.92	4.61	1.56	0.84	0.55	0.03	0.13	1.06	0.08	0.09	0.1	0.39	2.78	0.15	0.07	0.19	0.18	BDL	0.05	BDL	BDL	0.36	0.54	0.07	0.07	0.51	2.92	BDL	BDL	0.85	0.06	BDL	0.52	0.82	3.28	0.31	0.52	0.37	0.37	BDL	0.01	0.02	0.01	0.02	0.02	0.04	BDL	BDL	BDL
2019-11-11	0.58	1.35	1.29	0.62	0	0.92	0.14	0.5	0.06	0.3	0.09	0.12	0.08	0.03	BDL	0.05	0.05	BDL	0.05	BDL	BDL	0.36	0.25	0.08	0.06	1.33	1.31	BDL	BDL	0.63	0.07	0.07	0.19	0.81	1.76	0.3	0.48	0.33	0.36	BDL	0.02	0.03	0.01	0.03	0.05	0.04	0.09	BDL	BDL
2019-11-12	1.38	2.66	2.31	1.27	0.09	2.43	0.27	1.14	0.13	0.16	0.15	0.37	0.12	0.03	BDL	0.06	0.14	0.1	0.2	BDL	BDL	0.48	0.59	0.22	0.13	0.95	0.95	0.1	BDL	1.19	0.06	0.06	0.57	2.22	3.58	0.54	0.79	0.62	0.65	0.02	0.04	0.06	0.04	0.07	0.08	0.08	0.03	BDL	BDL
2019-11-13	1.39	5.63	1.9	0.99	0.62	0.68	0.22	1.71	0.14	0.14	0.16	0.27	3.21	0.22	0.1	0.07	0.11	0.05	0.13	BDL	BDL	0.55	0.93	0.11	0.11	0.99	0.96	0.1	BDL	0.95	BDL	BDL	0.85	1.02	2.56	0.37	0.58	0.45	0.46	0.01	BDL	0.03	0.03	0.02	0.04	0.06	0.02	BDL	BDL
2019-11-14	1.5	2.73	2.38	1.22	0.08	2.34	0.24	1.15	0.08	0.2	0.2	0.31	0.18	0.06	0.05	0.06	0.14	0.05	0.23	BDL	BDL	0.58	0.59	0.16	0.13	2.15	2.13	BDL	BDL	1.25	0.08	0.06	0.53	1.13	2.77	0.53	0.77	0.61	0.62	BDL	BDL	0.04	0.03	0.06	0.05	0.11	0.02	BDL	BDL
2019-11-15	0.98	2.44	2.19	1.1	BDL	1.53	0.32	1.01	0.17	0.28	0.3	0.34	0.11	0.04	0.05	0.11	0.14	0.06	0.23	BDL	BDL	0.75	0.6	0.25	0.22	0.69	0.68	0.11	BDL	1.12	0.06	0.06	0.51	1.98	3.48	0.46	0.67	0.57	0.57	0.02	0.04	0.07	0.07	0.08	0.13	0.19	0.06	BDL	BDL
2019-11-17	1.04	1.75	1.68	0.71	BDL	1.6	0.2	0.74	0.11	0.14	0.14	0.25	0.08	BDL	BDL	0	0.05	0.06	0.17	BDL	BDL	0.48	0.4	0.12	0.11	1.44	1.42	BDL	BDL	0.67	BDL	BDL	0.36	0.74	2.33	0.38	0.69	0.54	0.54	BDL	BDL	0.03	0.03	0.04	0.06	0.07	BDL	BDL	BDL
2019-11-18	1.84	3.52	2.49	1.62	BDL	0.44	0.39	1.21	0.09	0.18	0.24	0.43	0.13	0.03	BDL	0.05	0.14	0.04	0.15	BDL	BDL	0.45	0.68	0.26	0.16	2.47	2.42	BDL	BDL	1.63	0.13	BDL	0.57	2.34	3.23	0.58	0.81	0.65	0.69	0.01	0.02	0.03	0.03	0.05	0.06	0.1	BDL	BDL	BDL
2019-11-19	1.4	6.29	2.52	1.36	0.16	0.3	0.34	2	0.26	0.22	0.21	0.47	3.2	0.22	0.11	0.24	0.16	0.1	0.15	BDL	BDL	0.48	1.1	0.18	0.13	3.97	1.44	0.09	BDL	1.37	0.07	BDL	1.01	2.21	3.37	0.5	0.68	0.6	0.59	0.02	0.02	0.05	0.05	0.07	0.12	0.08	0.03	BDL	BDL
2019-11-21	3.2	4.58	3.8	1.85	0.07	1.52	0.46	1.95	0.16	0.25	0.25	0.79	0.16	0.09	0.11	0.09	0.15	0.09	0.12	BDL	BDL	0.45	0.75	0.41	0.2	0.61	0.6	0.12	BDL	1.86	0.08	0.08	0.95	2.91	3.64	0.73	0.98	0.78	0.79	0.03	0.05	0.08	0.08	0.11	0.14	0.22	0.06	BDL	BDL
2019-11-23	0.73	0.77	2.88	0.47	0.21	3.79	0.12	0.67	0.13	0.12	0.16	0.75	0.06	BDL	BDL	0.05	0.1	BDL	0.07	BDL	BDL	0.15	0	0.17	BDL	0.73	0.71	BDL	BDL	0.45	BDL	BDL	0.34	0.54	4.32	0.23	0.36	0.29	0.29	BDL	BDL	0.02	0.02	0.02	0.03	0.04	0.14	BDL	BDL
2019-11-25	0.44	0.48	0.87	0.31	BDL	0.43	0.18	0.29	BDL	0.17	0.06	0.06	0.09	BDL	BDL	0.05	0.04	BDL	0	BDL	BDL	0.17	0.11	0.09	BDL	0.8	0.69	BDL	BDL	0.32	BDL	BDL	0.09	0.52	1.3	0.56	0.86	0.63	0.61	BDL	BDL	BDL	BDL	BDL	BDL	BDL	BDL	BDL	BDL
2019-11-26	0.47	0.79	1.84	0.42	0.4	0.52	0.13	1.06	BDL	0.13	0.08	0.33	0.08	BDL	BDL	0.05	0.05	BDL	0.05	BDL	BDL	0.34	0.15	1.67	0.04	0.86	0.85	BDL	BDL	0.44	BDL	BDL	0.54	0.59	1.65	0.19	0.34	0.25	0.25	BDL	BDL	0.01	0.01	0.01	0.03	0.02	0.07	BDL	BDL
2019-11-27	0.57	0.93	2.47	0.56	0.37	0.17	0.24	1.38	BDL	0.14	0.17	0.41	0.08	0.03	BDL	0.05	0.04	BDL	0.06	BDL	BDL	0.37	0.39	1.56	0.08	1.09	1.08	BDL	BDL	0.58	BDL	BDL	0.7	0.72	5.13	0.28	0.49	0.34	0.34	0.01	BDL	0.02	0.01	0.02	0.04	0.03	0.04	BDL	BDL
[truncated: 46 more columns]
